# Supplementary material
Source: MDPI journal article supplement (https://www.mdpi.com/1424-2818/11/8/131)
Supplement: s1 [file s1]

Supplementary Table 1. Information of gene location used from Vertebrates genomes as in Table 1.

| Common Name | Scientific Name        | Code | TLR Gene Family | ENSEMBL/ GENE BANK/ GENOMIC LOCATION      |
|-------------|------------------------|------|-----------------|-------------------------------------------|
| Human       | Homo sapiens           | HSA  | TLR1            | ENSG00000174125                           |
|             |                        |      | TLR2            | ENSG00000137462                           |
|             |                        |      | TLR3            | ENSG00000164342                           |
|             |                        |      | TLR4            | ENSG00000136869                           |
|             |                        |      | TLR5            | ENSG00000187554                           |
|             |                        |      | TLR6            | ENSG00000174130                           |
|             |                        |      | TLR7            | ENSG00000196664                           |
|             |                        |      | TLR8            | ENSG00000101916                           |
|             |                        |      | TLR9            | ENSG00000173366                           |
|             |                        |      | TLR10           | ENSG00000174123                           |
|             |                        |      | TLR12P          | Chromosome 1: 33,466,249-33,468,954       |
| Cod         | Gadus morhua           | GMO  | TLR3            | ENSGMOG00000000786                        |
|             |                        |      | TLR7            | ENSGMOG00000001675                        |
|             |                        |      | TLR8A-L         | Sunderam et al 2012, Solbakken et al 2016 |
|             |                        |      | TLR9A-E         | Sunderam et al 2012, Solbakken et al 2016 |
|             |                        |      | TLR18           | ENSGMOG00000003793                        |
|             |                        |      | TLR21           | ENSGMOG000000018200                       |
|             |                        |      | TLR22A-L        | Sunderam et al 2012, Solbakken et al 2016 |
|             |                        |      | TLR23           | Sunderam et al 2012, Solbakken et al 2016 |
| Fugu        | Takifugu rubripes      | TRU  | TLR25A-G        | Sunderam et al 2012, Solbakken et al 2016 |
|             |                        |      | TLR1            | XM_003970363.2                            |
|             |                        |      | TLR2            | XM_011617903.1                            |
|             |                        |      | TLR3            | XM_003972308.2                            |
|             |                        |      | TLR5b           | XM_011611736.1_mem                        |
|             |                        |      | TLRs5a          | XM_003971921.2_soluble                    |
|             |                        |      | TLR7            | XM_011609151.1                            |
|             |                        |      | TLR8            | XM_011609158.1                            |
|             |                        |      | TLR9            | XM_003963302.2                            |
|             |                        |      | TLR18           | XM_011605231.1                            |
|             |                        |      | TLR21           | NM_001032579.1                            |
|             |                        |      | TLR22           | XM_011608077.1                            |
|             |                        |      | TLR23           | XM_003969133                              |
|             |                        |      |                 |                                           |
| Tetraodon   | Tetraodon nigroviridis | TNI  | TLR1            | ENSTNIG00000014211                        |
|             |                        |      | TLR2            | ENSTNIG00000003109                        |
|             |                        |      | TLR3            | ENSTNIG00000007123                        |
|             |                        |      | TLR5b           | ENSTNIG00000005998                        |
|             |                        |      | TLRs5a          | ENSTNIG00000019132                        |
|             |                        |      | TLR7            | ENSTNIG00000013960                        |
|             |                        |      | TLR8            | Chromosome 2: 12,678,508-12,681,830:1     |
|             |                        |      | TLR9            | ENSTNIG00000015008                        |
|             |                        |      | TLR18           | ENSTNIG00000006178                        |
|             |                        |      | TLR21           | ENSTNIG00000008206                        |
|             |                        |      | TLR22           | ENSTNIG00000013627                        |
|             |                        |      | TLR23           | ENSTNIG00000005385                        |
|             |                        |      |                 |                                           |
|             |                        |      |                 |                                           |

|             |                        |     |             |                                        |
|-------------|------------------------|-----|-------------|----------------------------------------|
| Zebrafish   | Danio rerio            | DAR | TLR1        | ENSDARG00000043032                     |
|             |                        |     | TLR2        | ENSDARG00000037758                     |
|             |                        |     | TLR3        | ENSDARG00000016065                     |
|             |                        |     | TLR4aI      | ENSDARG00000075671                     |
|             |                        |     | TLR4a       | ENSDARG00000019742                     |
|             |                        |     | TLR4b       | ENSDARG00000022048                     |
|             |                        |     | TLR5b       | ENSDARG00000044415                     |
|             |                        |     | TLR5b2      | ENSDARG00000052322                     |
|             |                        |     | TLR7        | ENSDARG00000068812                     |
|             |                        |     | TLR7_PSEUDO | Chromosome 9: 30,399,886-30,403,138:1  |
|             |                        |     | TLR7_PSEUDO | Chromosome 9: 54,582,021-54,582,864    |
|             |                        |     | TLR8C       | ENSDARG00000090119                     |
|             |                        |     | TLR8a       | ENSDARG00000089151                     |
|             |                        |     | TLR8b       | ENSDARG00000073675                     |
|             |                        |     | TLR9        | ENSDARG00000044490                     |
|             |                        |     | TLR18       | ENSDARG00000040249                     |
|             |                        |     | TLR19A      | ENSDARG00000026663                     |
|             |                        |     | TLR19B      | ENSDARG00000070392                     |
|             |                        |     | TLR20A      | ENSDARG00000092668                     |
|             |                        |     | TLR20D      | ENSDARG00000088701                     |
|             |                        |     | TLR20B      | ENSDARG00000094411                     |
|             |                        |     | TLR20F      | ENSDARG00000092355                     |
|             |                        |     | TLR20C      | ENSDARG00000041164                     |
|             |                        |     | TLR20E      | ENSDARG00000069593                     |
|             |                        |     | TLR21       | ENSDARG00000058045                     |
|             |                        |     | TLR22       | ENSDARG000000104045                    |
| Stickleback | Gasterosteus aculeatus | GAC | TLR1        | ENSGACG00000017958                     |
|             |                        |     | TLR2        | ENSGACG00000018669                     |
|             |                        |     | TLR3        | ENSGACG00000016874                     |
|             |                        |     | TLR5Sb      | ENSGACG00000007147                     |
|             |                        |     | TLR5M       | ENSGACG00000004381                     |
|             |                        |     | TLR5Sa      | ENSGACG00000007154                     |
|             |                        |     | TLR7        | ENSGACG00000003996                     |
|             |                        |     | TLR8        | ENSGACG00000003992                     |
|             |                        |     | TLR9        | ENSGACG00000010164                     |
|             |                        |     | TLR18       | ENSGACG00000001745                     |
|             |                        |     | TLR21a      | ENSGACG00000009364                     |
|             |                        |     | TLR21b      | ENSGACG00000008397                     |
|             |                        |     | TLR22       | ENSGACG00000005449                     |
| Medaka      | Oryzias latipes        | ORL | TLR1        | ENSORL.G00000004420                    |
|             |                        |     | TLR2        | ENSORL.G00000002540                    |
|             |                        |     | TLR3        | ENSORL.G00000008184                    |
|             |                        |     | TLR5b       | ENSORL.G00000016221                    |
|             |                        |     | TLR5a       | ENSORL.G00000017639                    |
|             |                        |     | TLR7        | Chromosome 21: 26,169,747-26,173,142:1 |
|             |                        |     | TLR8        | Chromosome:21:26174579:26177859:1      |
|             |                        |     | TLR9        | ENSORL.G00000008852                    |
|             |                        |     | TLR18       | ENSORL.G00000015704                    |
|             |                        |     | TLR21       | ENSORL.G00000013437                    |
|             |                        |     | TLR22       | ENSORL.G00000020413                    |
|             |                        |     | TLR25       | ENSORL.G00000012771                    |

|            |                       |     |             |                                      |
|------------|-----------------------|-----|-------------|--------------------------------------|
| Platyfish  | Xiphophorus maculatus | XMA | TLR1        | ENSXMAG00000008414                   |
|            |                       |     | TLR2a       | ENSXMAG00000008258TLR2 (1 of 2)      |
|            |                       |     | TLR2b       | ENSXMAG00000008259TLR2 (2 of 2)      |
|            |                       |     | TLR3        | ENSXMAG00000018871TLR3               |
|            |                       |     | TLR5A       | ENSXMAG00000006310TLR5 (1 of 2)      |
|            |                       |     | TLR5B       | ENSXMAG00000001788TLR5 (2 of 2)      |
|            |                       |     | TLR7        | ENSXMAG00000004434TLR7               |
|            |                       |     | TLR8        | ENSXMAG00000004433TLR8               |
|            |                       |     | TLR9        | ENSXMAG00000007629TLR9               |
|            |                       |     | TLR18       | ENSXMAG00000013367                   |
|            |                       |     | TLR21       | ENSXMAG00000010772                   |
|            |                       |     | TLR22A      | ENSXMAG00000020395                   |
|            |                       |     | TLR22B      | ENSXMAG00000003638                   |
|            |                       |     | TLR22C      | ENSXMAG00000017252                   |
|            |                       |     | TLR23A      | Scaffold JH556800.1: 602,908-605,667 |
|            |                       |     | TLR23B      | Scaffold JH556800.1: 614,188-616,918 |
|            |                       |     | TLR23C      | Scaffold JH556800.1: 625,221-625,610 |
|            |                       |     | TLR23D      | Scaffold JH556800.1: 629,640-632,373 |
|            |                       |     | TLR23E      | Scaffold JH556800.1: 646,924-647,791 |
|            |                       |     | TLR23F      | Scaffold JH556800.1: 655,116-655,930 |
| Tilapia    | Oreochromis niloticus | ONI | TLR1        | XM_013271073.1                       |
|            |                       |     | TLR2A       | XM_013264298.1                       |
|            |                       |     | TLR2B       | XM_005460756.2                       |
|            |                       |     | TLR2        | XM_005460757.1                       |
|            |                       |     | TLR2_PAR    | XM_005466799.2                       |
|            |                       |     | TLR2_PAR    | XM_005466800.2                       |
|            |                       |     | TLR3        | XM_003449728.3                       |
|            |                       |     | TLR5_SOLU_a | XM_013271973.1                       |
|            |                       |     | TLR5_MEM_b  | XM_005449891.2                       |
|            |                       |     | TLR7        | XM_013264229.1                       |
|            |                       |     | TLR8a       | XM_003460594.3                       |
|            |                       |     | TLR8b       | XM_013264230.1                       |
|            |                       |     | TLR9        | XM_005477981.2                       |
|            |                       |     | TLR18       | XM_003450307.3                       |
|            |                       |     | TLR21a      | XM_005463956.2                       |
|            |                       |     | TLR21b      | XM_003458802.2                       |
|            |                       |     | TLR21c      | NM_001311317.1                       |
|            |                       |     | TLR22a      | XM_003460394.3                       |
|            |                       |     | TLR22b      | XM_013264208.1                       |
|            |                       |     | TLR22c      | XM_005449134.2                       |
|            |                       |     | TLR23a      | XM_013264888.1                       |
|            |                       |     | TLR23b      | XM_013264886.1                       |
|            |                       |     | TLR23c      | XM_013264887.1                       |
|            |                       |     | TLR25       | XM_005460356.2                       |
| Coelacanth | Latimeria chalumnae   | LAC | TLR1        | ENSLACG00000010038                   |
|            |                       |     | TLR2        | ENSLACG00000012590                   |
|            |                       |     | TLR2L       | ENSLACG00000004773                   |
|            |                       |     | TLR3        | ENSLACG00000011410                   |
|            |                       |     | TLR5pseudo  | AFYH01284233.1:49-1002               |

|         |                       |     |           |                                      |
|---------|-----------------------|-----|-----------|--------------------------------------|
| Xenopus | Xenopus tropicalis    | XET | TLR5b_mem | ENSLACG00000015379                   |
|         |                       |     | TLR7a     | ENSLACG00000004229                   |
|         |                       |     | TLR7b     | ENSLACG00000001037                   |
|         |                       |     | TLR8      | ENSLACG000000016637                  |
|         |                       |     | TLR9      | ENSLACG000000018420                  |
|         |                       |     | TLR13     | ENSLACG000000012864                  |
|         |                       |     | TLR18     | ENSLACG000000017699                  |
|         |                       |     | TLR21a    | ENSLACG000000001078                  |
|         |                       |     | TLR21b    | ENSLACG000000006376                  |
|         |                       |     | TLR21c    | ENSLACG000000002657                  |
|         |                       |     | TLR27     | ENSLACG000000015138                  |
|         |                       |     | TLR1 1    | GL173030.1:983000-985412             |
|         |                       |     | TLR1 2    | ENSXETG000000018477                  |
|         |                       |     | TLR1 3    | ENSXETG000000018489                  |
| Mouse   | Mus musculus          | MUS | TLR3      | ENSXETG000000005873                  |
|         |                       |     | TLR5      | ENSXETG000000030446                  |
|         |                       |     | TLR2a     | ENSXETG000000033109                  |
|         |                       |     | TLR2b     | ENSXETG000000001817                  |
|         |                       |     | TLR5b     | ENSXETG000000015027                  |
|         |                       |     | TLR7      | ENSXETG000000027076                  |
|         |                       |     | TLR8a     | ENSXETG000000030579                  |
|         |                       |     | TLR8b     | GL172707.1:833802-836931             |
|         |                       |     | TLR9      | ENSXETG000000005958                  |
|         |                       |     | TLR13     | ENSXETG000000004577                  |
|         |                       |     | TLR14A    | ENSXETG000000031826                  |
|         |                       |     | TLR14b    | ENSXETG000000021898                  |
|         |                       |     | TLR14c    | ENSXETG000000021933                  |
|         |                       |     | TLR14d    | ENSXETG000000017689                  |
|         |                       |     | TLR16     | ENSXETG000000032510                  |
|         |                       |     | TLR21     | ENSXETG000000032848                  |
|         |                       |     | TLR22     | ENSXETG000000018306                  |
|         |                       |     | TLR1      | ENSMUSG0000000044827                 |
|         |                       |     | TLR2      | ENSMUSG0000000027995                 |
|         |                       |     | TLR3      | ENSMUSG0000000031639                 |
|         |                       |     | TLR4      | ENSMUSG0000000039005                 |
|         |                       |     | TLR5      | ENSMUSG0000000079164                 |
|         |                       |     | TLR6      | ENSMUSG0000000051498                 |
|         |                       |     | TLR7      | ENSMUSG0000000044583                 |
|         |                       |     | TLR8      | ENSMUSG0000000040522                 |
|         |                       |     | TLR9      | ENSMUSG0000000045322                 |
|         |                       |     | TLR10     | Chromosome 5:64896921-64898474:MINUS |
|         |                       |     | TLR11     | ENSMUSG0000000051969                 |
|         |                       |     | TLR12     | ENSMUSG0000000062545                 |
|         |                       |     | TLR13     | ENSMUSG0000000033777                 |
| Opossum | Monodelphis domestica | MOD | TLR2      | XM_001375753.3                       |
|         |                       |     | TLR3      | XM_007496034.2                       |
|         |                       |     | TLR4      | XM_001368732.3                       |
|         |                       |     | TLR5      | XM_007481456.1                       |
|         |                       |     | TLR6      | XM_007496564.2                       |
|         |                       |     | TLR7      | XM_007500926.2                       |
|         |                       |     | TLR8      | XM_007500927.2                       |
|         |                       |     | TLR9      | XM_007500513.1                       |
|         |                       |     | TLR10     | XM_007496591.1                       |
|         |                       |     | TLR12     | XM_001516788.1                       |

|                          |                          |     |              |                                          |
|--------------------------|--------------------------|-----|--------------|------------------------------------------|
| Platypus                 | Ornithorhynchus anatinus | OAN | TLR13        | XM_001372402.2                           |
|                          |                          |     | TLR2         | ENSOANG00000005291                       |
|                          |                          |     | TLR3         | ENSOANG00000004937                       |
|                          |                          |     | TLR4         | ENSOANG00000013202                       |
|                          |                          |     | TLR5         | ENSOANG00000001445                       |
|                          |                          |     | TLR6         | Ultra544:4634632-4637016 plus            |
|                          |                          |     | TLR7         | ENSOANG00000002612                       |
|                          |                          |     | TLR8         | ENSOANG00000015882                       |
|                          |                          |     | TLR9         | ENSOANG00000014852                       |
|                          |                          |     | TLR10        | ENSOANG00000010318                       |
|                          |                          |     | TLR12        | ENSOANG00000001379                       |
|                          |                          |     | TLR13Partial | Contig49661: 1-1,689                     |
| Anole lizard             | Anolis carolinensis      | ACA | TLR1a        | ENSACAG00000024414                       |
|                          |                          |     | TLR1b        | ENSACAG00000007342                       |
|                          |                          |     | TLR2a        | ENSACAG00000023058                       |
|                          |                          |     | TLR2b        | ENSACAG00000021135                       |
|                          |                          |     | TLR3         | ENSACAG00000001732                       |
|                          |                          |     | TLR4         | ENSACAG00000013911                       |
|                          |                          |     | TLR5b_Mem    | ENSACAG00000002483                       |
|                          |                          |     | TLR5a_solu   | ENSACAG00000023912                       |
|                          |                          |     | TLR7         | ENSACAG00000001655                       |
|                          |                          |     | TLR13        | ENSACAG00000016646                       |
|                          |                          |     | TLR18        | ENSACAG00000024450                       |
|                          |                          |     | TLR15        | ENSACAG00000025732                       |
|                          |                          |     | TLR21        | ENSACAG00000015069                       |
|                          |                          |     | TLR22        | ENSACAG00000028117                       |
| Chinese softshell turtle | Pelodiscus sinensis      | PSI | TLR1A        | Scaffold JH210475.1: 1,926,342-1,926,908 |
|                          |                          |     | TLR1B        | Scaffold JH210475.1: 1,908,091-1,910,123 |
|                          |                          |     | TLR2a        | ENSPSIG00000000537                       |
|                          |                          |     | TLR2b        | ENSPSIG00000000529                       |
|                          |                          |     | TLR3         | ENSPSIG00000010900                       |
|                          |                          |     | TLR4         | ENSPSIG00000003827                       |
|                          |                          |     | TLR5a        | JH212639:593558-595522                   |
|                          |                          |     | TLR5b        | ENSPSIG00000000533                       |
|                          |                          |     | TLR7         | ENSPSIG00000000409                       |
|                          |                          |     | TLR8a        | ENSPSIG00000010094                       |
|                          |                          |     | TLR8b        | ENSPSIG00000000439                       |
|                          |                          |     | TLR8c        | ENSPSIG00000000427                       |
|                          |                          |     | TLR9         | ENSPSIG00000012812                       |
|                          |                          |     | TLR18        | Scaffold JH207675.1: 111,570-113,183     |
|                          |                          |     | TLR21        | ENSPSIG00000014031                       |
|                          |                          |     | TLR22a       | ENSPSIG00000000250                       |
|                          |                          |     | TLR22b       | JH224649:4898350-4901214                 |
|                          |                          |     | TLR2 pseudo  | Scaffold JH210535:81435-82781            |
| Chicken                  | Gallus gallus            | GAL | TLR1A        | ENSGALG00000017485                       |
|                          |                          |     | TLR1B        | ENSGALG00000027093                       |
|                          |                          |     | TLR2A        | ENSGALG00000009237                       |
|                          |                          |     | TLR2B        | ENSGALG00000009239                       |
|                          |                          |     | TLR3         | ENSGALG00000013468                       |
|                          |                          |     | TLR4         | ENSGALG00000007001                       |
|                          |                          |     | TLR5         | ENSGALG00000009392                       |

|                    |                            |     |               |                                                |
|--------------------|----------------------------|-----|---------------|------------------------------------------------|
| Zebra Finch        | Taeniopygia guttata        | TGU | TLR7          | ENSGALG00000016590                             |
|                    |                            |     | TLR15         | ENSGALG00000008166                             |
|                    |                            |     | TLR21         | ENSGALG00000000774                             |
|                    |                            |     | TLR1A         | ENSTGUG000000009041                            |
|                    |                            |     | TLR1B         | ENSTGUG000000009043                            |
|                    |                            |     | TLR2A         | ENSTGUG000000005179                            |
|                    |                            |     | TLR2B         | ENSTGUG000000005181                            |
|                    |                            |     | TLR3          | ENSTGUG000000006891                            |
|                    |                            |     | TLR4          | ENSTGUG000000003342                            |
|                    |                            |     | TLR5          | ENSTGUG000000002653                            |
| Turkey             | Meleagris gallopavo        | MGA | TLR7          | ENSTGUG000000008250                            |
|                    |                            |     | TLR15         | ENSTGUG000000007261                            |
|                    |                            |     | TLR21         | ENSTGUG000000014873                            |
|                    |                            |     | TLR1A         | Chromosome 4:52459418-52460914                 |
|                    |                            |     | TLR1B         | ENSMGAG000000015741                            |
|                    |                            |     | TLR2A         | ENSMGAG000000001271                            |
|                    |                            |     | TLR2B         | Chromosome 4: 299,887-302,519                  |
|                    |                            |     | TLR3          | ENSMGAG000000011425                            |
|                    |                            |     | TLR4          | ENSMGAG000000005422                            |
|                    |                            |     | TLR5          | ENSMGAG000000015929                            |
| Lamprey            | Petromyzon marinus         | PMA | TLR7          | ENSMGAG000000014706                            |
|                    |                            |     | TLR15         | ENSMGAG000000015891                            |
|                    |                            |     | TLR21         | ENSMGAG000000015581                            |
|                    |                            |     | TLR3          | ENSPMAG000000001609                            |
|                    |                            |     | TLR7_8A       | ENSPMAG000000002336                            |
|                    |                            |     | TLR7_8B       | ENSPMAG000000006251                            |
|                    |                            |     | TLR14D        | ENSPMAG000000001845                            |
|                    |                            |     | TLR14B        | scaffold:Pmarinus_7.0:GL482135:8342:10651:plus |
|                    |                            |     | TLR14C        | ENSPMAG000000010085                            |
|                    |                            |     | TLR14A        | ENSPMAG000000010230                            |
|                    |                            |     | TLR24A        | ENSPMAG000000010419                            |
|                    |                            |     | TLR24B        | ENSPMAG000000010418                            |
|                    |                            |     | TLR21A        | ENSPMAG000000010099                            |
|                    |                            |     | TLR21B        | ENSPMAG000000005013                            |
|                    |                            |     | TLR21C        | ENSPMAG000000010181                            |
|                    |                            |     | TLR22         | ENSPMAG000000009344                            |
| Cat Fish           | Ictalurus punctatus        |     |               | Zhang J et al. 2013. Dev. Comp. Immunol.       |
| American alligator | Alligator mississippiensis | AMI | TLR1A_PARTIAL | XM_006258501.2                                 |
|                    |                            |     | TLR1B_PARTIAL | XM_006258498.2                                 |
|                    |                            |     | TLR2A         | XM_006264461.2                                 |
|                    |                            |     | TLR2B_PARTIAL | XM_014611524.1                                 |
|                    |                            |     | TLR3          | XM_014594861.1                                 |
|                    |                            |     | TLR4          | XM_014608218.1                                 |
|                    |                            |     | TLR5MEM       | XM_014598157.1                                 |
|                    |                            |     | TLR5SOL       | XM_014596433.1                                 |
|                    |                            |     | TLR7          | XM_006258898.1                                 |
|                    |                            |     | TLR8a         | XM_006258899.1                                 |
|                    |                            |     | TLR8b         | XM_014607765.1                                 |
|                    |                            |     | TLR13         | XM_006277653.2                                 |
|                    |                            |     | TLR13 partial | XM_006277720.2                                 |

|                        |                |                |                   |                |
|------------------------|----------------|----------------|-------------------|----------------|
|                        |                |                | TLR18             | XM_006266453.2 |
|                        |                |                | TLR15             | XM_006274445.1 |
|                        |                |                | TLR21             | XM_014604107.1 |
|                        |                |                | TLR22             | XM_006278050.2 |
| Green sea turtle       | Chelonia mydas | CMY            | TLR1              | XM_007059713.1 |
|                        |                |                | TLR2a             | LOC102930340   |
|                        |                |                | TLR2b             | LOC102943966   |
|                        |                |                | TLR2 Pseudo       | LOC102944187   |
|                        |                |                | TLR2 Pseudo       | LOC102948090   |
|                        |                |                | TLR3              | XM_007063639.1 |
|                        |                |                | TLR4              | XM_007057276.1 |
|                        |                |                | TLR5-b            | XM_007070449.1 |
|                        |                |                | TLR5-a            | LOC102935193   |
|                        |                |                | TLR7              | XM_007060255.1 |
|                        |                |                | TLR8a             | LOC102936357   |
|                        |                |                | TLR8b             | LOC102929320   |
|                        |                |                | TLR8c Pseudo      | LOC102929541   |
|                        |                |                | TLR9              | XM_007072645.1 |
|                        |                |                | TLR18             | LOC102934124   |
|                        |                |                | TLR21             | LOC102932182   |
|                        |                |                | TLR22             | LOC102933568   |
| Painted Turtle         | TLR1b          | NW_007281374.1 | 1073972-1075936   | minus          |
| Chrysemys picta bellii | TLR1a          | NW_007281374.1 | 1052625-1082355   | minus          |
| CPI                    | TLR2a          | NW_007281363.1 | 6915182-6922124   | minus          |
|                        | TLR2b          | NW_007281363.1 | 6930769-6934678   | minus          |
|                        | TLR2 Pseudo    | NW_007281478.1 | 2029068-2031867   | minus          |
|                        | TLR3           | NW_007281348.1 | 3232636-3258099   | plus           |
|                        | TLR4           | NW_007281396.1 | 2815764-2823017   | minus          |
|                        | TLR5b          | NC_024220.1    | 29396277-29464002 | plus           |
|                        | TLR5a          | NW_007359864.1 | 6454634-6456598   | minus          |
|                        | TLR7           | NW_007281929.1 | 16159-158348      | minus          |
|                        | TLR8C          | NW_007281432.1 | 486376-514205     | minus          |
|                        | TLR8A          | NW_007281432.1 | 425823-433047     | minus          |
|                        | TLR8B          | NW_007281432.1 | 448377-469596     | minus          |
|                        | TLR9           | NW_007281433.1 | 3140067-3140628   | plus           |
|                        | TLR13          | NW_007281758.1 | 356935-361762     | plus           |
|                        | TLR18          | NW_007281382.1 | 239091-246077     | minus          |
|                        | TLR21          | NW_007282527.1 | 35847-40133       | minus          |
|                        | TLR22          | NW_007359863.1 | 3714789-3718615   | minus          |
| Saltwater crocodile    | TLR1A          | scaffold-2618  | 14028-26421       | minus          |
| Crocodylus porosus     | TLR1B          | scaffold-16355 | 54510-66333       | minus          |
| CPO                    | TLR2A          | scaffold-5033  | 166862-178589     | plus           |
|                        | TLR2B          | scaffold-7567  | 6888-18654        | plus           |
|                        | TLR3           | scaffold-13333 | 34392-46380       | minus          |
|                        | TLR4           | scaffold-5054  | 390416-402680     | plus           |
|                        | TLR5           | scaffold-7445  | 166148-178679     | minus          |
|                        | TLR7           | scaffold-7909  | 22433-35525       | plus           |
|                        | TLR8A          | scaffold-7909  | 53369-66461       | plus           |
|                        | TLR8B          | scaffold-10130 | 11455-24610       | plus           |
|                        | TLR13          | scaffold-98    | 21348-33975       | plus           |
|                        | TLR15          | scaffold-2513  | 298977-311601     | minus          |
|                        | TLR18          | scaffold-19646 | 79941-92256       | plus           |
|                        | TLR21          | scaffold-12709 | 10-8641           | plus           |
|                        | TLR22          | scaffold-16286 | 312758-325541     | minus          |

|                      |              |                            |               |       |
|----------------------|--------------|----------------------------|---------------|-------|
| Gharial              | TLR1A        | scaffold39093              | 2414-14813    | minus |
| Gavialis gangeticus  | TLR1B        | scaffold37111              | 13777-25744   | minus |
| GGA                  | TLR2A        | scaffold25747              | 35451-47628   | plus  |
|                      | TLR2B        | scaffold7208               | 5283-17625    | plus  |
|                      | TLR3         | scaffold40862              | 2099-13919    | minus |
|                      | TLR4         | scaffold4129               | 233709-245964 | plus  |
|                      | TLR5         | scaffold880                | 33731-46271   | minus |
|                      | TLR7         | scaffold26318              | 40719-53808   | minus |
|                      | TLR8A        | scaffold26318              | 2766-15885    | minus |
|                      | TLR8B        | scaffold6915               | 7137-20292    | plus  |
|                      | TLR13        | scaffold11898              | 215983-228610 | minus |
|                      | TLR15        | scaffold3177               | 66099-78723   | minus |
|                      | TLR18        | scaffold13001              | 27411-39738   | minus |
|                      | TLR21        | scaffold10392              | 101071-113830 | minus |
|                      | TLR22        | scaffold166                | 501410-514196 | plus  |
| Python               | TLR1         | XM_007437894.2             |               |       |
| Python molurus       | TLR2a        | XM_015889785.1             |               |       |
| PMO                  | TLR2b        | XM_007425609.2             |               |       |
|                      | TLR3         | XM_007439002.2             |               |       |
|                      | TLR4         | XM_007433542.2             |               |       |
|                      | TLR5a        | XM_007439931.1             |               |       |
|                      | TLR5b        | XM_015889124.1             |               |       |
|                      | TLR7         | XM_007435644.1             |               |       |
|                      | TLR18        | XM_007436577.2             |               |       |
|                      | TLR15        | XM_007444506.1             |               |       |
|                      | TLR21        | XM_015888483.1             |               |       |
|                      | TLR22        | NW_006532080.1:41595-44441 |               |       |
| Spotted gar          | TLR1         | XM_015345878.1             |               |       |
| Lepisosteus oculatus | TLR1 partial | XM_015355233.1             |               |       |
| LEO                  | TLR2         | XM_015344719.1             |               |       |
|                      | TLR3         | XM_006630108.2             |               |       |
|                      | TLR4         | XM_015366876.1             |               |       |
|                      | TLR5m        | XM_006625986.2             |               |       |
|                      | TLR7         | XM_015361454.1             |               |       |
|                      | TLR8a        | XM_015361455.1             |               |       |
|                      | TLR8b        | XM_015361493.1             |               |       |
|                      | TLR9a        | XM_015348292.1             |               |       |
|                      | TLR9b        | XM_015348046.1             |               |       |
|                      | TLR18        | XM_015336729.1             |               |       |
|                      | TLR22        | XM_015349956.1             |               |       |
|                      | TLR23        | XM_006625652.2             |               |       |
|                      | TLR25        | XM_015353150.1             |               |       |
|                      | TLR25        | XM_015352785.1             |               |       |
| Equus_caballus       | TLR1         | ENSECAG00000038588         |               |       |
| Equus_caballus       | TLR10        | ENSECAG00000020892         |               |       |
| Equus_caballus       | TLR11        | ENSECAG00000006701         |               |       |
| Equus_caballus       | TLR12        | ENSECAG00000005400         |               |       |
| Equus_caballus       | TLR13        | X:61051093-61053730        |               |       |
| Equus_caballus       | TLR2         | ENSECAG00000018028         |               |       |
| Equus_caballus       | TLR3         | ENSECAG00000000197         |               |       |
| Equus_caballus       | TLR4         | ENSECAG000000033740        |               |       |
| Equus_caballus       | TLR5         | ENSECAG000000036553        |               |       |
| Equus_caballus       | TLR6         | ENSECAG000000001958        |               |       |
| Equus_caballus       | TLR7         | ENSECAG000000007883        |               |       |
| Equus_caballus       | TLR8         | ENSECAG000000009180        |               |       |



|                  |       |                      |
|------------------|-------|----------------------|
| Equus_caballus   | TLR9  | ENSECAG00000014294   |
| Canis_familiaris | TLR1  | ENSCAFG000000024010  |
| Canis_familiaris | TLR10 | ENSCAFG000000016175  |
| Canis_familiaris | TLR2  | ENSCAFG000000008351  |
| Canis_familiaris | TLR3  | ENSCAFG000000007406  |
| Canis_familiaris | TLR4  | ENSCAFG000000003518  |
| Canis_familiaris | TLR5  | ENSCAFG000000011368  |
| Canis_familiaris | TLR6  | ENSCAFG000000016172  |
| Canis_familiaris | TLR7  | ENSCAFG000000011698  |
| Canis_familiaris | TLR8  | ENSCAFG000000023498  |
| Canis_familiaris | TLR9  | ENSCAFG000000023201  |
| Bos_taurus       | TLR1  | 6:58051169-58053505  |
| Bos_taurus       | TLR10 | 6:58034660-58037079  |
| Bos_taurus       | TLR2  | ENSBTAG000000008008  |
| Bos_taurus       | TLR3  | ENSBTAG000000008682  |
| Bos_taurus       | TLR4  | ENSBTAG000000006240  |
| Bos_taurus       | TLR5  | ENSBTAG000000000477  |
| Bos_taurus       | TLR6  | 6:58068196-58070516  |
| Bos_taurus       | TLR7  | ENSBTAG000000022161  |
| Bos_taurus       | TLR8  | PENSBTAG000000031020 |
| Bos_taurus       | TLR9  | ENSBTAG000000018198  |
| Myotis_lucifugus | TLR1  | ENSMUG000000008417   |
| Myotis_lucifugus | TLR11 | ENSMUG0000000026159  |
| Myotis_lucifugus | TLR12 | ENSMUG0000000028208  |
| Myotis_lucifugus | TLR13 | ENSMUG0000000026413  |
| Myotis_lucifugus | TLR2  | ENSMUG000000012813   |
| Myotis_lucifugus | TLR3  | ENSMUG000000012567   |
| Myotis_lucifugus | TLR4  | ENSMUG000000007417   |
| Myotis_lucifugus | TLR5  | ENSMUG0000000030769  |
| Myotis_lucifugus | TLR6  | ENSMUG000000008430   |
| Myotis_lucifugus | TLR7  | ENSMUG0000000003912  |
| Myotis_lucifugus | TLR8  | ENSMUG000000012745   |
| Myotis_lucifugus | TLR9  | ENSMUG000000015097   |
| Gekko_japonicus  | TLR1A | LOC107116375         |
| Gekko_japonicus  | TLR1B | LOC107116262         |
| Gekko_japonicus  | TLR13 | LOC107113131         |
| Gekko_japonicus  | TLR15 | LOC107118830         |
| Gekko_japonicus  | TLR18 | LOC107107978         |
| Gekko_japonicus  | TLR21 | LOC107115007         |
| Gekko_japonicus  | TLR22 | LOC107119739         |
| Gekko_japonicus  | TLR2a | Gene ID:107108593    |
| Gekko_japonicus  | TLR3  | GenelD:107121983     |
| Gekko_japonicus  | TLR4  | GenelD:107106055     |
| Gekko_japonicus  | TLR5  | GenelD:107121624     |
| Gekko_japonicus  | TLR5  | GenelD:107110111     |
| Gekko_japonicus  | TLR7  | GenelD:107124266     |
| Pogona_vitticeps | TLR1a | LOC110075223         |
| Pogona_vitticeps | TLR1b | LOC110075222         |
| Pogona_vitticeps | TLR13 | LOC110078546         |
| Pogona_vitticeps | TLR21 | LOC110086777         |
| Pogona_vitticeps | TLR22 | LOC110072303         |
| Pogona_vitticeps | TLR2  | LOC110082123         |
| Pogona_vitticeps | TLR2  | GenelD:110072767     |
| Pogona_vitticeps | TLR18 | LOC110069865         |
| Pogona_vitticeps | TLR3  | GenelD:110083608     |
| Pogona_vitticeps | TLR4  | GenelD:110088887     |
| Pogona_vitticeps | TLR5  | GenelD:110069864     |
| Pogona_vitticeps | TLR5  | GenelD:110071659     |

|                                     |       |                  |
|-------------------------------------|-------|------------------|
| <i>Pogona_vitticeps</i>             | TLR5  | GenelD:110071691 |
| <i>Pogona_vitticeps</i>             | TLR5  | GenelD:110075393 |
| <i>Pogona_vitticeps</i>             | TLR7  | LOC110075448     |
| <i>Protobothrops_mucrosquamatus</i> | TLR1  | LOC107293704     |
| <i>Protobothrops_mucrosquamatus</i> | TLR13 | GenelD:107282446 |
| <i>Protobothrops_mucrosquamatus</i> | TLR2  | LOC107288063     |
| <i>Protobothrops_mucrosquamatus</i> | TLR2a | GenelD:107289574 |
| <i>Protobothrops_mucrosquamatus</i> | TLR15 | LOC107285496     |
| <i>Protobothrops_mucrosquamatus</i> | TLR21 | LOC107289709     |
| <i>Protobothrops_mucrosquamatus</i> | TLR2  | LOC107290599     |
| <i>Protobothrops_mucrosquamatus</i> | TLR3  | GenelD:107302660 |
| <i>Protobothrops_mucrosquamatus</i> | TLR4  | GenelD:107285740 |
| <i>Protobothrops_mucrosquamatus</i> | TLR5  | LOC107295996     |
| <i>Protobothrops_mucrosquamatus</i> | TLR5  | GenelD:107302774 |
| <i>Protobothrops_mucrosquamatus</i> | TLR7  | GenelD:107302471 |

Supplementary Table 2 Avian TLR genes used in this study for Positive selection analysis

| SPECIES_NAME                               | 1A                | 1B                | 2A                | 2B                | 3              | 4              | 5              | 7              | 15             |
|--------------------------------------------|-------------------|-------------------|-------------------|-------------------|----------------|----------------|----------------|----------------|----------------|
| <i>Calypte_anna</i>                        | Geno_scaff_region | XM_008491888.1    | XM_008493863.1    | XM_008493793.1    | XM_008491852.1 | XM_008499333.1 | NA             | XM_008494759.1 | XM_008493258.1 |
| <i>Caprimulgus_caroline</i><br><i>nsis</i> | Geno_scaff_region | Geno_scaff_region | Geno_scaff_region | Geno_scaff_region | XM_010170240.1 | XM_010165071.1 | XM_010164361.1 | XM_010175260.1 | XM_010174731.1 |
| <i>Cariama_cristata</i>                    | Geno_scaff_region | Geno_scaff_region | Geno_scaff_region | Geno_scaff_region | XM_009700362.1 | XM_009702452.1 | NA             | XM_009696068.1 | XM_009706095.1 |
| <i>Colius_striatus</i>                     | Geno_scaff_region | Geno_scaff_region | Geno_scaff_region | Geno_scaff_region | XM_010203505.1 | XM_010195927.1 | XM_010204457.1 | XM_010209014.1 | XM_010206127.1 |
| <i>Columba_livia</i>                       | XM_005501264.1    | XM_005501263.2    | XM_021285390.1    | XM_013372151.2    | XM_005500210.1 | XM_005498384.1 | XM_021299623.1 | XM_005512700.2 | XM_021280471.1 |
| <i>Corvus_brachyrhynch</i><br><i>os</i>    | XM_017744288.1    | XM_008641370.2    | XM_008635647.2    | XM_017736870.1    | XM_008641455.2 | XM_008638328.2 | XM_017730068.1 | NU             | XM_008642044.2 |
| <i>Cuculus_canorus</i>                     | XM_009566580.1    | Geno_scaff_region | Geno_scaff_region | XM_009567139.1    | XM_009565656.1 | XM_009569425.1 | XM_009569717.1 | NU             | XM_009560965.1 |
| <i>Acanthisitta_chloris</i>                | Geno_scaff_region | Geno_scaff_region | Geno_scaff_region | Geno_scaff_region | XM_009072290.1 | XM_009073130.1 | NA             | NU             | XM_009081785.1 |
| <i>Egretta_garzetta</i>                    | XM_009641277.1    | XM_009641275.1    | XM_009639343.1    | Geno_scaff_region | XM_009642418.1 | XM_009634876.1 | XM_009637106.1 | XM_009646337.1 | XM_009640695.1 |
| <i>Eurypyga_helias</i>                     | Geno_scaff_region | Geno_scaff_region | NA                | XM_010160072.1    | XM_010156014.1 | XM_010156250.1 | NA             | XM_010146638.1 | XM_010151478.1 |
| <i>Falco_peregrinus</i>                    | XM_005243208.1    | XM_005243247.1    | XM_005232499.2    | XM_005232498.2    | XM_005243141.1 | XM_005231393.1 | XM_005241848.1 | XM_005239443.1 | XM_005235036.1 |
| <i>Fulmarus_glacialis</i>                  | Geno_scaff_region | Geno_scaff_region | Geno_scaff_region | Geno_scaff_region | XM_009585392.1 | XM_009586474.1 | XM_009572390.1 | XM_009572361.1 | XM_009586905.1 |
| <i>Gallus_gallus</i>                       | AB109401.1        | DQ518918.1        | FJ915432.1        | AB046533.2        | EF137861.1     | AY064697.1     | FJ915551.1     | FJ915600.1     | NM_001037835.1 |
| <i>Anas_platyrhynchos</i>                  | JN572685.1        | JN572686.1        | HQ166194.1        | JN572687.1        | XM_005008981.1 | JN048668.1     | KF255555.1     | DQ888644.1     | JN618074.1     |
| <i>Gavia_stellata</i>                      | Geno_scaff_region | Geno_scaff_region | Geno_scaff_region | Geno_scaff_region | XM_009811989.1 | XM_009809127.1 | XM_009821515.1 | XM_009813692.1 | XM_009821678.1 |
| <i>Geospiza_fortis</i>                     | XM_005431639.1    | XM_005415453.1    | XM_005415589.1    | Geno_scaff_region | XM_005415516.1 | XM_005423810.1 | NA             | NU             | XM_005422604.2 |
| <i>Haliaeetus_albicilla</i>                | XM_010574438.1    | XM_010574439.1    | Geno_scaff_region | Geno_scaff_region | XM_009915940.1 | XM_009915776.1 | XM_009928565.1 | XM_009913820.1 | XM_009927303.1 |
| <i>Chaetura_pelagica</i>                   | XM_010006120.1    | XM_010006119.1    | XM_009995900.1    | XM_009995901.1    | XM_010002467.1 | XM_010007952.1 | NA             | XM_010008803.1 | XM_010004652.1 |
| <i>Charadrius_vociferus</i>                | XM_009884994.1    | XM_009884995.1    | XM_009893695.1    | XM_009893696.1    | XM_009883901.1 | XM_009888044.1 | XM_009894296.1 | NU             | XM_009886001.1 |
| <i>Leptosomus_discolor</i>                 | Geno_scaff_region | Geno_scaff_region | Geno_scaff_region | Geno_scaff_region | XM_009953213.1 | XM_009947763.1 | XM_009950947.1 | XM_009960331.1 | XM_009953779.1 |
| <i>Manacus_vitellinus</i>                  | XM_008927407.1    | XM_008927408.1    | XM_018071536.1    | XM_018071543.1    | XM_018069963.1 | XM_018074164.1 | XM_018085042.1 | NU             | XM_008924845.2 |
| <i>Meleagris_gallopavo</i>                 | FJ477857.1        | FJ477858.1        | FJ477860.1        | FJ477861.1        | XM_003205774.1 | XM_003211211.1 | HQ436463.1     | XM_003203086.1 | HQ456924.1     |
| <i>Melospittacus_undula</i><br><i>tus</i>  | XM_005149134.1    | XM_005149188.1    | NA                | Geno_scaff_region | XM_005149053.1 | XM_005145616.1 | XM_005151875.1 | XM_005151439.1 | XM_005144697.1 |
| <i>Merops_nubicus</i>                      | NA                | NA                | NA                | NA                | XM_008943939.1 | NA             | XM_008950209.1 | XM_008935272.1 |                |
| <i>Mesitomis_unicolor</i>                  | Geno_scaff_region | Geno_scaff_region | Geno_scaff_region | Geno_scaff_region | XM_010181262.1 | XM_010193770.1 | XM_010194240.1 | NU             | XM_010182944.1 |
| <i>Nestor_notabilis</i>                    | Geno_scaff_region | Geno_scaff_region | Geno_scaff_region | Geno_scaff_region | XM_010013832.1 | XM_010014853.1 | NA             | XM_010019975.1 | XM_010013070.1 |
| <i>Nipponia_nippon</i>                     | XM_009461836.1    | XM_009461835.1    | Geno_scaff_region | XM_009474742.1    | XM_009474837.1 | XM_009475802.1 | XM_009472928.1 | XM_009476283.1 | XM_009476126.1 |
| <i>Opisthocomus_hoazin</i>                 | XM_009935562.1    | XM_009935561.1    | Geno_scaff_region | Geno_scaff_region | XM_009940192.1 | XM_009935409.1 | XM_009937341.1 | XM_009943495.1 | XM_009931299.1 |
| <i>Pelecanus_crispus</i>                   | Geno_scaff_region | Geno_scaff_region | Geno_scaff_region | Geno_scaff_region | XM_009486220.1 | XM_009481688.1 | XM_009485400.1 | XM_009489888.1 | XM_009492835.1 |
| <i>Phaethon_lepturus</i>                   | Geno_scaff_region | Geno_scaff_region | Geno_scaff_region | Geno_scaff_region | XM_010281742.1 | XM_010293516.1 | NA             | XM_010290259.1 | XM_010282406.1 |
| <i>Phalacrocorax_carbo</i>                 | Geno_scaff_region | Geno_scaff_region | Geno_scaff_region | Geno_scaff_region | XM_009505917.1 | XM_009514274.1 | XM_009513901.1 | XM_009501983.1 | XM_009507639.1 |
| <i>Picoides_pubescens</i>                  | XM_009896574.1    | XM_009896575.1    | XM_009898369.1    | XM_009898379.1    | XM_009902217.1 | XM_009907081.1 | XM_009901238.1 | XM_009896972.1 | XM_009902092.1 |
| <i>Pterocles_gutturalis</i>                | Geno_scaff_region | Geno_scaff_region | Geno_scaff_region | Geno_scaff_region | XM_010074246.1 | XM_010073689.1 | XM_010074631.1 | XM_010076693.1 | XM_010085978.1 |
| <i>Pygoscelis_adeliae</i>                  | Geno_scaff_region | XM_009332470.1    | XM_009329794.1    | XM_009329795.1    | XM_009330657.1 | XM_009319316.1 | XM_009333665.1 | XM_009318873.1 | XM_009319611.1 |
| <i>Struthio_camelus</i>                    | XM_009673363.1    | XM_009673448.1    | XM_009677116.1    | XM_009677114.1    | XM_009676700.1 | XM_009668178.1 | XM_009686697.1 | XM_009683661.1 | XM_009669051.1 |
| <i>Apaloderma_vittatum</i>                 | Geno_scaff_region | Geno_scaff_region | Geno_scaff_region | Geno_scaff_region | XM_009871058.1 | XM_009867818.1 | NA             | NU             | XM_009870709.1 |
| <i>Taeniopygia_guttata</i>                 | XM_012573617.1    | XM_004176603.1    | XM_002198470.2    | XM_002196366.1    | XM_002190852.2 | FJ695612.1     | XM_002188726.1 | NU             | XM_002197069.2 |
| <i>Tauraco_erythrolophu</i><br><i>s</i>    | Geno_scaff_region | Geno_scaff_region | Geno_scaff_region | Geno_scaff_region | XM_009986371.1 | XM_009978945.1 | XM_009978079.1 | XM_009991025.1 | XM_009979140.1 |
| <i>Tinamus_guttatus</i>                    | XM_010219197.1    | XM_010219196.1    | XM_010212759.1    | XM_010212759.1    | XM_010219604.1 | XM_010219200.1 | XM_010217273.1 | XM_010228317.1 | XM_010218127.1 |
| <i>Tyto_alba</i>                           | Geno_scaff_region | NA                | Geno_scaff_region | Geno_scaff_region | XM_009970053.1 | XM_009970420.1 | XM_009968647.1 | XM_009975060.1 | XM_009975442.1 |
| <i>Aptenodytes_forsteri</i>                | XM_009280175.1    | XM_009280152.2    | XM_009283352.2    | XM_009283317.1    | XM_009277378.2 | XM_009282256.2 | XM_009275754.1 | XM_009278529.2 | XM_009288440.1 |
| <i>Balearica regulorum</i>                 | Geno_scaff_region | Geno_scaff_region | Geno_scaff_region | Geno_scaff_region | XM_010310965.1 | XM_010304091.1 | XM_010301313.1 | XM_010309901.1 | XM_010298512.1 |

|                    |                   |                   |                   |                   |                |                |                |                |                |
|--------------------|-------------------|-------------------|-------------------|-------------------|----------------|----------------|----------------|----------------|----------------|
| Buceros_rhinoceros | Geno_scaff_region | Geno_scaff_region | Geno_scaff_region | Geno_scaff_region | XM_010135016.1 | XM_010137451.1 | XM_010140290.1 | XM_010140535.1 | XM_010142512.1 |
|--------------------|-------------------|-------------------|-------------------|-------------------|----------------|----------------|----------------|----------------|----------------|
