# Supplementary material
Source: MDPI journal article supplement (https://www.mdpi.com/1424-2818/11/8/131)
Supplement: s1 [file s1]

## Supplementary Table 2

### Domain characterization of TLR1A

The conserved segment of each LRR is underlined. The conserved leucine or equivalent hydrophobic residues are in green and the conserved asparagine or equivalent hydrogen-donor residues are in red. The amino acids identified as under positive selection are in bold. In addition to that, *M8 sites under positive selection* are in italic, with *Type 2 residue* colored in light blue.

| TLR1A - Gallus gallus - NP_001007489.4 |       |      |                                                                                                                                                                                                                        |
|----------------------------------------|-------|------|------------------------------------------------------------------------------------------------------------------------------------------------------------------------------------------------------------------------|
| Domain                                 | Start | Stop | Sequence                                                                                                                                                                                                               |
| Signal                                 | 1     | 24   | MGSLTSIYVFACVFLSILWNNIQP                                                                                                                                                                                               |
| LRR-NT                                 | 25    | 52   | TVENKITANYSGHLLTEVPKNIPVHTHI                                                                                                                                                                                           |
| LRR1                                   | 53    | 73   | THILDLSHNSISEITNFRFTSLSD                                                                                                                                                                                               |
| LRR2                                   | 74    | 97   | LQVLNLSHNLITELDFSAFMFNQD                                                                                                                                                                                               |
| LRR3                                   | 98    | 118  | LEYLDLSHNNIWTAYCQLLAR                                                                                                                                                                                                  |
| LRR4                                   | 119   | 143  | LRHLDLSFNKFTVLPICQEFQIMFH                                                                                                                                                                                              |
| LRR5                                   | 144   | 166  | LEYGLSAMMIRRSDFRYVAHLQ                                                                                                                                                                                                 |
| LRR6                                   | 167   | 189  | LDTVFLTLEDFSLYEPLSLTALN                                                                                                                                                                                                |
| LRR7                                   | 190   | 217  | TRSLHIVFATNQNFNFSLLYDGMSTSEK                                                                                                                                                                                           |
| LRR8                                   | 218   | 244  | LKIVNLRYTLSHKDFSPSLELQKKIK                                                                                                                                                                                             |
| LRR9                                   | 245   | 271  | TTDLTLDTVDLWTVILQIFLLVWDSS                                                                                                                                                                                             |
| LRR10                                  | 272   | 310  | VEHLTVRNLI <del>FR</del> GPVVELTEYKHVPLLRSLQQLSLGSS                                                                                                                                                                    |
| LRR11                                  | 311   | 339  | MKALT <del>LER</del> VNRNKLYYFNQEILYRQFSEMN                                                                                                                                                                            |
| LRR12                                  | 340   | 361  | ISLTIHDACMPHMLCPKKRSS                                                                                                                                                                                                  |
| LRR13                                  | 362   | 385  | FQYINFSRNALDEL <del>FQ</del> NCDTLAN                                                                                                                                                                                   |
| LRR14                                  | 386   | 411  | LKIL <del>LHR</del> NKFESLSKVSFMTSRMKS                                                                                                                                                                                 |
| LRR15                                  | 412   | 436  | LRYLDMSSNLLRNSRAEGRCQWADS                                                                                                                                                                                              |
| LRR16                                  | 437   | 458  | LAELDLSSNQLTEAVFECLPAN                                                                                                                                                                                                 |
| LRR17                                  | 459   | 481  | IN <del>KVD</del> LQNNQIANVPKGITELHS                                                                                                                                                                                   |
| LRR18                                  | 482   | 503  | LQELNLAS <del>NRL</del> ADLPGCRAFTG                                                                                                                                                                                    |
| LRR19                                  | 504   | 527  | LEILNIERNLILTPSADFFETCPS                                                                                                                                                                                               |
| LRR20                                  | 532   | 554  | VKE <del>LQAGQN</del> PFKCSCELOD <del>FL</del> RL                                                                                                                                                                      |
| LRR-CT                                 | 555   | 591  | ERQSGGKLSGWPEAYVCKYPEDLSGTQLED <del>FHL</del> TELACNTT                                                                                                                                                                 |
| Transmembrane                          | 592   | 614  | LLLVTALLTLVLVAVVAF <del>PC</del> IIY                                                                                                                                                                                   |
| TIR                                    | 615   | 818  | LDVPWYVRMLWQWTQTKRRAWHDCPEERETALQFHAFISYSERDSLWVKNELIP<br>NLEKGEGCICLCQHERNFIPGKSIVENIINCIEKSYKSIFVLSPNFVQSEWCHYELYFA<br>HHRLFSENSNLILILEPIPSYVIPARYHKLKALMAKRTYLEWPKERSKHALFWANL<br>RAVVNIKLPSTFETDEEQSDVTSTSSITQCLIK |

### Supplementary Table 3

#### Domain characterization of TLR1B

The conserved segment of each LRR is underlined. The conserved leucine or equivalent hydrophobic residues are in green and the conserved asparagine or equivalent hydrogen-donor residues are in red. The amino acids identified as under positive selection are in bold. In addition to that, *M8 sites under positive selection* are in italic, with *Type 2 residue* colored in light blue and *type 1 residue* in dark blue.

| TLR1B - Gallus gallus - NP_001075178.3 |       |      |                                                                                                                                                                                                         |
|----------------------------------------|-------|------|---------------------------------------------------------------------------------------------------------------------------------------------------------------------------------------------------------|
| Domain                                 | Start | Stop | Sequence                                                                                                                                                                                                |
| Signal                                 | 1     | 31   | MTKNMRYLRNCFIYNCLFVFTFWDNIGLA                                                                                                                                                                           |
| LRR-NT                                 | 32    | 76   | NELFAS <b>V</b> P <b>N</b> NFLEDGLDKKNMSFPHSY <b>ANNQ</b> HYKADYGWVVIENT                                                                                                                                |
| LRR1                                   | 77    | 105  | TES <b>L</b> <u>SLSEI</u> ADDNVRKLITLLSKFRKGSR                                                                                                                                                          |
| LRR2                                   | 106   | 132  | <u>LRNLT</u> <b>L</b> <u>T</u> <b>N</b> MSVDW <b>KD</b> <b>I</b> KVLQV <sup>1</sup> VWHSS                                                                                                               |
| LRR3                                   | 133   | 158  | <u>IEYFN</u> <b>I</b> <u>N</u> <b>L</b> TQLGNV <b>V</b> STRFDYS <b>K</b> TS                                                                                                                             |
| LRR4                                   | 159   | 187  | <u>MKAF</u> <b>A</b> V <b>N</b> K <b>V</b> LITDLYF <b>S</b> QDDIYNIFANMN                                                                                                                                |
| LRR5                                   | 188   | 209  | <u>IAALT</u> <b>I</b> <u>A</u> <b>E</b> SELIHMLCPSSDSP                                                                                                                                                  |
| LRR6                                   | 210   | 233  | <u>LR</u> <b>Y</b> <b>I</b> <u>N</u> <b>F</b> <b>S</b> K <b>N</b> DLTDLFQNCDKLIQ                                                                                                                        |
| LRR7                                   | 234   | 259  | <u>LET</u> <b>F</b> <u>L</u> <b>H</b> <b>R</b> <b>N</b> K <b>F</b> ESL <b>S</b> KVSFMTSRMKS                                                                                                             |
| LRR8                                   | 260   | 284  | <u>LR</u> <b>Y</b> <b>L</b> <b>D</b> <b>M</b> <b>S</b> <b>S</b> <b>N</b> LLRNSRAE <b>G</b> RQCWADS                                                                                                      |
| LRR9                                   | 285   | 306  | <u>LA</u> <b>E</b> <u>L</u> <b>D</b> <b>L</b> <b>S</b> <b>S</b> <b>N</b> QLTE <b>A</b> VFECLPAN                                                                                                         |
| LRR10                                  | 307   | 329  | <u>I</u> <b>N</b> <b>K</b> <b>V</b> <b>D</b> <u>L</u> <b>Q</b> <b>N</b> <b>N</b> QIASVPKGITELHS                                                                                                         |
| LRR11                                  | 330   | 351  | <u>LQ</u> <b>E</b> <u>L</u> <b>N</b> <b>L</b> <b>A</b> <b>S</b> <b>N</b> RLADLPGCRAFTG                                                                                                                  |
| LRR12                                  | 352   | 375  | <u>LE</u> <b>I</b> <b>L</b> <b>N</b> <b>I</b> <b>E</b> <b>R</b> <b>N</b> LILTPSADFF <b>E</b> TCPS                                                                                                       |
| LRR13                                  | 376   | 398  | <u>V</u> <b>K</b> <b>E</b> <b>L</b> <b>Q</b> <b>A</b> <b>G</b> <b>Q</b> <b>N</b> PFKCSELQDFL <b>R</b> <b>L</b>                                                                                          |
| LRR-CT                                 | 399   | 440  | ERQSGGKL <b>S</b> GWPEA <b>Y</b> VCKYPEDLSGTQLKDFHLTELACNTTL                                                                                                                                            |
| Transmembrane                          | 441   | 463  | LLVTALLTLVLVAVVAFLCIYL                                                                                                                                                                                  |
| TIR                                    | 495   | 652  | DVPWYVRMLWQWTQTKRRAWHDCPEERETALQFHAFISYSERDSLWVKNELIP<br>NLEKGEGCIQLCQHERNFIPGKSIVENIINCIEKSYKSIFVLSPNFVQSEWCHYELYFA<br>HHKLFSSENSNLILLEPIPPYVIPARYHKLKALMAKRTYLEWPKERSKHALFWANLR<br>AAISINLSVADEQNRTEV |

## Supplementary Table 4

### Domain characterization of TLR2A

The conserved segment of each LRR is underlined. The conserved leucine or equivalent hydrophobic residues are in green and the conserved asparagine or equivalent hydrogen-donor residues are in red. The amino acids identified as under positive selection are in bold. In addition to that, *M8 sites under positive selection* are in italic, with *Type 2 residue* colored in light blue and *type 1 residue* in dark blue.

| TLR2A - Gallus gallus - NP_989609.1 |       |      |                                                                                                                                                                                                                                                             |
|-------------------------------------|-------|------|-------------------------------------------------------------------------------------------------------------------------------------------------------------------------------------------------------------------------------------------------------------|
| Domain                              | Start | Stop | Sequence                                                                                                                                                                                                                                                    |
| Signal                              | 1     | 25   | MFNQSQ <b>Q</b> KPTMKLMW <b>Q</b> AWLIYTALA                                                                                                                                                                                                                 |
| LRR-NT                              | 26    | 63   | AH <b>L</b> PEEQALRQACLSCDA <b>T</b> QSCNCSFMGLDFIP <b>P</b> G <b>L</b> T <b>G</b>                                                                                                                                                                          |
| LRR1                                | 65    | 88   | <b>I</b> <b>T</b> <u><b>V</b>L<b>N</b>L<b>A</b>H<b>N</b>R<b>I</b>K<b>L</b></u> <b>I</b> R <b>T</b> H <b>D</b> L <b>Q</b> K <b>A</b> V <b>N</b>                                                                                                              |
| LRR2                                | 89    | 112  | <b>L</b> <b>R</b> <u><b>T</b><b>L</b><b>L</b><b>L</b><b>Q</b><b>S</b><b>N</b><b>Q</b></u> <b>I</b> <b>S</b> <b>S</b> <b>I</b> <b>D</b> <b>E</b> <b>D</b> <b>S</b> <b>F</b> <b>G</b> <b>S</b> <b>Q</b> <b>G</b> <b>K</b>                                     |
| LRR3                                | 113   | 136  | <b>L</b> <b>E</b> <b>L</b> <b>L</b> <b>D</b> <b>L</b> <b>S</b> <b>N</b> <b>N</b> <b>S</b> <b>L</b> <b>A</b> <b>H</b> <b>L</b> <b>S</b> <b>P</b> <b>V</b> <b>W</b> <b>F</b> <b>G</b> <b>P</b> <b>L</b> <b>F</b> <b>S</b>                                     |
| LRR4                                | 137   | 161  | <b>L</b> <b>Q</b> <b>H</b> <b>L</b> <b>R</b> <b>I</b> <b>Q</b> <b>G</b> <b>N</b> <b>S</b> <b>Y</b> <b>S</b> <b>D</b> <b>L</b> <b>G</b> <b>E</b> <b>S</b> <b>S</b> <b>P</b> <b>F</b> <b>S</b> <b>S</b> <b>L</b> <b>R</b> <b>N</b>                            |
| LRR5                                | 162   | 185  | <b>L</b> <b>S</b> <b>S</b> <b>L</b> <b>H</b> <b>L</b> <b>G</b> <b>N</b> <b>P</b> <b>Q</b> <b>F</b> <b>S</b> <b>I</b> <b>R</b> <b>Q</b> <b>G</b> <b>N</b> <b>F</b> <b>E</b> <b>G</b> <b>I</b> <b>V</b> <b>F</b>                                              |
| LRR6                                | 186   | 209  | <b>L</b> <b>N</b> <b>T</b> <b>L</b> <b>R</b> <b>I</b> <b>D</b> <b>G</b> <b>D</b> <b>N</b> <b>L</b> <b>S</b> <b>Q</b> <b>Y</b> <b>E</b> <b>P</b> <b>G</b> <b>S</b> <b>L</b> <b>K</b> <b>S</b> <b>I</b> <b>R</b> <b>K</b>                                     |
| LRR7                                | 210   | 233  | <b>I</b> <b>N</b> <b>H</b> <b>M</b> <b>I</b> <b>S</b> <b>I</b> <b>R</b> <b>R</b> <b>I</b> <b>D</b> <b>V</b> <b>F</b> <b>S</b> <b>A</b> <b>V</b> <b>I</b> <b>R</b> <b>D</b> <b>L</b> <b>L</b> <b>H</b> <b>S</b>                                              |
| LRR8                                | 234   | 260  | <b>A</b> <b>I</b> <b>W</b> <b>L</b> <b>E</b> <b>V</b> <b>R</b> <b>E</b> <b>I</b> <b>K</b> <b>L</b> <b>D</b> <b>I</b> <b>E</b> <b>N</b> <b>E</b> <b>K</b> <b>L</b> <b>V</b> <b>Q</b> <b>N</b> <b>S</b> <b>T</b> <b>L</b> <b>P</b> <b>L</b> <b>T</b>          |
| LRR9                                | 261   | 288  | <b>I</b> <b>Q</b> <b>K</b> <b>L</b> <b>T</b> <b>F</b> <b>T</b> <b>G</b> <b>A</b> <b>S</b> <b>F</b> <b>T</b> <b>D</b> <b>K</b> <b>Y</b> <b>I</b> <b>S</b> <b>Q</b> <b>I</b> <b>A</b> <b>V</b> <b>L</b> <b>L</b> <b>K</b> <b>E</b> <b>I</b> <b>R</b> <b>S</b> |
| LRR10                               | 289   | 317  | <b>L</b> <b>R</b> <b>E</b> <b>L</b> <b>E</b> <b>A</b> <b>I</b> <b>D</b> <b>C</b> <b>V</b> <b>L</b> <b>E</b> <b>G</b> <b>K</b> <b>G</b> <b>A</b> <b>W</b> <b>D</b> <b>M</b> <b>T</b> <b>E</b> <b>I</b> <b>A</b> <b>R</b> <b>S</b> <b>K</b> <b>Q</b> <b>S</b> |
| LRR11                               | 318   | 346  | <b>I</b> <b>E</b> <b>T</b> <b>L</b> <b>S</b> <b>I</b> <b>T</b> <b>N</b> <b>M</b> <b>T</b> <b>I</b> <b>L</b> <b>D</b> <b>F</b> <b>Y</b> <b>L</b> <b>F</b> <b>D</b> <b>L</b> <b>E</b> <b>G</b> <b>I</b> <b>E</b> <b>T</b> <b>Q</b> <b>V</b> <b>G</b> <b>K</b> |
| LRR12                               | 347   | 370  | <b>L</b> <b>K</b> <b>R</b> <b>L</b> <b>S</b> <b>I</b> <b>A</b> <b>S</b> <b>S</b> <b>K</b> <b>V</b> <b>F</b> <b>M</b> <b>V</b> <b>P</b> <b>C</b> <b>R</b> <b>L</b> <b>A</b> <b>R</b> <b>Y</b> <b>F</b> <b>S</b>                                              |
| LRR13                               | 371   | 397  | <b>L</b> <b>L</b> <b>Y</b> <b>L</b> <b>D</b> <b>F</b> <b>H</b> <b>D</b> <b>N</b> <b>L</b> <b>L</b> <b>V</b> <b>N</b> <b>N</b> <b>R</b> <b>L</b> <b>G</b> <b>E</b> <b>T</b> <b>I</b> <b>C</b> <b>E</b> <b>D</b> <b>A</b> <b>W</b> <b>P</b> <b>S</b>          |
| LRR14                               | 398   | 423  | <b>L</b> <b>Q</b> <b>T</b> <b>L</b> <b>N</b> <b>L</b> <b>S</b> <b>K</b> <b>N</b> <b>S</b> <b>L</b> <b>K</b> <b>S</b> <b>L</b> <b>K</b> <b>Q</b> <b>A</b> <b>A</b> <b>R</b> <b>Y</b> <b>I</b> <b>S</b> <b>N</b> <b>L</b> <b>H</b> <b>K</b>                   |
| LRR15                               | 424   | 446  | <b>L</b> <b>I</b> <b>N</b> <b>L</b> <b>D</b> <b>I</b> <b>S</b> <b>E</b> <b>N</b> <b>N</b> <b>F</b> <b>G</b> <b>E</b> <b>I</b> <b>P</b> <b>D</b> <b>M</b> <b>C</b> <b>E</b> <b>W</b> <b>P</b> <b>E</b> <b>N</b>                                              |
| LRR16                               | 447   | 467  | <b>L</b> <b>K</b> <b>Y</b> <b>L</b> <b>N</b> <b>L</b> <b>S</b> <b>S</b> <b>T</b> <b>Q</b> <b>I</b> <b>P</b> <b>K</b> <b>L</b> <b>T</b> <b>T</b> <b>C</b> <b>I</b> <b>P</b> <b>S</b> <b>T</b>                                                                |
| LRR17                               | 468   | 487  | <b>L</b> <b>E</b> <b>V</b> <b>L</b> <b>D</b> <b>V</b> <b>S</b> <b>A</b> <b>N</b> <b>N</b> <b>L</b> <b>Q</b> <b>D</b> <b>F</b> <b>G</b> <b>L</b> <b>Q</b> <b>L</b> <b>P</b> <b>F</b>                                                                         |
| LRR18                               | 488   | 509  | <b>L</b> <b>K</b> <b>E</b> <b>L</b> <b>Y</b> <b>L</b> <b>T</b> <b>K</b> <b>N</b> <b>H</b> <b>L</b> <b>K</b> <b>T</b> <b>L</b> <b>P</b> <b>E</b> <b>A</b> <b>T</b> <b>D</b> <b>I</b> <b>P</b> <b>N</b>                                                       |
| LRR19                               | 510   | 533  | <b>L</b> <b>V</b> <b>A</b> <b>M</b> <b>S</b> <b>I</b> <b>S</b> <b>R</b> <b>N</b> <b>K</b> <b>L</b> <b>N</b> <b>S</b> <b>F</b> <b>S</b> <b>K</b> <b>E</b> <b>E</b> <b>F</b> <b>E</b> <b>S</b> <b>F</b> <b>K</b> <b>Q</b>                                     |
| LRR20                               | 534   | 357  | <b>M</b> <b>E</b> <b>L</b> <b>L</b> <b>D</b> <b>A</b> <b>S</b> <b>A</b> <b>N</b> <b>N</b> <b>F</b> <b>I</b> <b>C</b> <b>S</b> <b>C</b> <b>E</b> <b>F</b> <b>L</b> <b>S</b> <b>F</b> <b>I</b> <b>H</b> <b>H</b> <b>E</b>                                     |
| LRR-CT                              | 358   | 598  | AGIAQVLVGWPESYICDSPLTVRGAQVGSVQLSLMECHR                                                                                                                                                                                                                     |
| Transmembrane                       | 597   | 619  | SLLVSLICTLVFLFILVVG                                                                                                                                                                                                                                         |
| TIR                                 | 620   | 793  | KYHAVWYMRMTWAWLQAKRKPKRAPTKDICYDAFVSYSENDSNWVENIMVQ<br>QLEQACPPFRLCLHKRDFVPGKWIVDNIIDSIEKSHKTLFVLSEHFVQSEWCKYELD<br>FSHFRLFDENNDVAILILLEPIQSQAIPKRFCCKLRKIMNTKTYLEWPPDEEQQMMF<br>WENLKAALKS                                                                 |

## Supplementary Table 5

### Supplementary Domain characterization of TLR2B

The conserved segment of each LRR is underlined. The conserved leucine or equivalent hydrophobic residues are in green and the conserved asparagine or equivalent hydrogen-donor residues are in red. The amino acids identified as under positive selection are in bold. In addition to that, *M8 sites under positive selection* are in italic, with *Type 2 residue* colored in light blue and *type 1 residue* in dark blue.

| TLR2B - Zebrafinch - XP_002196402.1 |       |      |                                                                                                                                                                                             |
|-------------------------------------|-------|------|---------------------------------------------------------------------------------------------------------------------------------------------------------------------------------------------|
| Domain                              | Start | Stop | Sequence                                                                                                                                                                                    |
| Signal                              | 1     | 20   | MTAHIWRVLAIVILAASLS                                                                                                                                                                         |
| LRR-NT                              | 25    | 54   | LKQACPSCDGSQLCNCSSMGLDFIPPGVTA                                                                                                                                                              |
| LRR1                                | 56    | 79   | <u>ITVLNLAHNR</u> IKRIQSQDLQQAVN                                                                                                                                                            |
| LRR2                                | 80    | 103  | <u>LRALLQSN</u> KISSIDEDSF <i>W</i> SLEK                                                                                                                                                    |
| LRR3                                | 104   | 127  | <u>LELLDLSNNS</u> LAHLSPVWFGHLFS                                                                                                                                                            |
| LRR4                                | 128   | 152  | <u>LQHLHLEGNS</u> YRDLGQSSPFSCLKN                                                                                                                                                           |
| LRR5                                | 153   | 176  | <u>LSSLHLGNPQ</u> FSVIRHGNFEGIEL                                                                                                                                                            |
| LRR6                                | 177   | 200  | <u>LHKLWIDGSNLS</u> QYEQGSLKSIKQ                                                                                                                                                            |
| LRR7                                | 201   | 224  | <u>INHMILNLRNG</u> YIFSEIVRDLHS                                                                                                                                                             |
| LRR8                                | 225   | 251  | <u>VTWLEVRRIA</u> FSIAAEMQVLRVMSSSF                                                                                                                                                         |
| LRR9                                | 252   | 279  | <u>AKKISFRQTL</u> LDATVPEIVSILEDMPQ                                                                                                                                                         |
| LRR10                               | 280   | 307  | <u>LVELELVDCR</u> LLGTGQWKMEIQAKKSQT                                                                                                                                                        |
| LRR11                               | 308   | 336  | <u>LRILTIKKLS</u> IEEFYLFIDLHSVEGLLSL                                                                                                                                                       |
| LRR12                               | 337   | 360  | <u>LTRVTVQNT</u> KVFLVPCRISQNLLS                                                                                                                                                            |
| LRR13                               | 361   | 387  | <u>LVYLDLSANLL</u> GDLSLEHSACQGGWPS                                                                                                                                                         |
| LRR14                               | 388   | 413  | <u>LQALNLSQNS</u> LSDLERTSKSLSHLGN                                                                                                                                                          |
| LRR15                               | 414   | 436  | <u>LIVLDISQNN</u> FGIPEIDVCDWPKS                                                                                                                                                            |
| LRR16                               | 437   | 457  | <u>LKYLNLSTQ</u> IPKVTTICIPQT                                                                                                                                                               |
| LRR17                               | 458   | 477  | <u>LEVLDVSGNN</u> LKEFGLRLPL                                                                                                                                                                |
| LRR18                               | 478   | 499  | <u>LKELYLTRNQ</u> LKTLPGAAPIPN                                                                                                                                                              |
| LRR19                               | 500   | 523  | <u>LVSLSVSRN</u> KLNSFSKEEFESFRR                                                                                                                                                            |
| LRR20                               | 524   | 547  | <u>MKLLDASGN</u> NFICSCEFLSFIHHE                                                                                                                                                            |
| LRR-CT                              | 548   | 586  | AGISQVLVGWPDKYVCDSP LAVRGAQVGAVHLSLMECHR                                                                                                                                                    |
| Transmembrane                       | 587   | 609  | SLVVSLLICVLVFLVILLVAVGY                                                                                                                                                                     |
| TIR                                 | 610   | 783  | KYHMMVWYLRMTAWWLQAKRKPKRAPPKDV CYDAFVSYSENDSWVENTMVREL<br>EQACPPFRLCLHKRDFVPGKWIVDNIIDSIEKSRKTLFVLSEHFVQSEWCKYELDFSHF<br>RLFDENNDAAAILVLEPIQSKAIPKRFCCLKRIMNTKTYLEWPLEEEQQQMFWFNLKI<br>ALRS |

Supplementary Table 6

## Domain characterization of TLR3

The conserved segment of each LRR is underlined. The conserved leucine or equivalent hydrophobic residues are in green and the conserved asparagine or equivalent hydrogen-donor residues are in red. The amino acids identified as under positive selection are in bold. In addition to that, *M8 sites under positive selection* are in italic, with *Type 2 residue* colored in light blue.

| TLR3 – Gallus gallus- NP_001011691.3 |       |      |                                                                                                                                                                                                                       |
|--------------------------------------|-------|------|-----------------------------------------------------------------------------------------------------------------------------------------------------------------------------------------------------------------------|
| Domain                               | Start | Stop | Sequence                                                                                                                                                                                                              |
| Signal                               | 1     | 26   | MGCSIPCW <b>N</b> SLSFRLVFCCLLCAS <b>V</b> G                                                                                                                                                                          |
| LRR-NT                               | 27    | 52   | KQC <b>Q</b> IRNTMADCSHLKLTQIPSDLP <b>K</b>                                                                                                                                                                           |
| LRR1                                 | 54    | 77   | ITG <b>L</b> DISH <b>N</b> QLKKL <b>D</b> PENLT <b>E</b> YSN                                                                                                                                                          |
| LRR2                                 | 78    | 101  | LIY <b>L</b> NAGY <b>N</b> IISKLPGLCKNLPL                                                                                                                                                                             |
| LRR3                                 | 102   | 125  | LQ <b>L</b> KLEH <b>N</b> QLHELPDGVFASCSN                                                                                                                                                                             |
| LRR4                                 | 126   | 148  | LT <b>E</b> L <b>N</b> LG <b>N</b> IIEVKNDPFKTLEN                                                                                                                                                                     |
| LRR5                                 | 149   | 172  | LN <b>I</b> LDLSH <b>N</b> HLKSANLG <b>L</b> QQQLKN                                                                                                                                                                   |
| LRR6                                 | 173   | 198  | LR <b>E</b> LVL <b>S</b> <b>N</b> QITELNKEDLKFLSNTS                                                                                                                                                                   |
| LRR7                                 | 199   | 222  | LN <b>S</b> LD <b>L</b> SS <b>N</b> PLKEFH <b>T</b> GCLHAIGN                                                                                                                                                          |
| LRR8                                 | 223   | 249  | LFGL <b>L</b> LN <b>N</b> VELGEN <b>R</b> TKKLCTELSDTA                                                                                                                                                                |
| LRR9                                 | 250   | 275  | IQN <b>L</b> SLSHVKLSHINRLTLQGLQGTN                                                                                                                                                                                   |
| LRR10                                | 276   | 299  | LT <b>V</b> L <b>N</b> LSK <b>N</b> SLSVIEDDSFQWLSK                                                                                                                                                                   |
| LRR11                                | 300   | 323  | LE <b>Y</b> L <b>N</b> LE <b>D</b> NNIINVSSHLFYGLSS                                                                                                                                                                   |
| LRR12                                | 324   | 347  | IT <b>H</b> L <b>N</b> L <b>I</b> NS <b>L</b> TGKIEDFSFQWL <b>H</b> H                                                                                                                                                 |
| LRR13                                | 348   | 371  | LE <b>Y</b> L <b>I</b> MD <b>N</b> NNFPRITTNMFTGLKN                                                                                                                                                                   |
| LRR14                                | 372   | 399  | L <b>K</b> YLS <b>L</b> Y <b>N</b> CNTNLQRITNKT FVSLANSS                                                                                                                                                              |
| LRR15                                | 400   | 423  | LQ <b>V</b> L <b>N</b> LTK <b>T</b> RISTVESGAFSSLGQ                                                                                                                                                                   |
| LRR16                                | 424   | 448  | L <b>K</b> ILD <b>L</b> GL <b>N</b> EINQELTGHEFGL <b>N</b> N                                                                                                                                                          |
| LRR17                                | 449   | 472  | IE <b>Y</b> I <b>L</b> SY <b>N</b> K <b>N</b> V <b>T</b> LRSESFIFVPS                                                                                                                                                  |
| LRR18                                | 473   | 498  | LR <b>K</b> LM <b>L</b> RKVGCNNLAISPSPFHPLRN                                                                                                                                                                          |
| LRR19                                | 499   | 522  | LT <b>V</b> LD <b>I</b> SN <b>N</b> IANIKEDLFNGLHE                                                                                                                                                                    |
| LRR20                                | 523   | 554  | LD <b>I</b> L <b>N</b> LQH <b>N</b> NLARLWKCANPGGPVFLKDVPN                                                                                                                                                            |
| LRR21                                | 555   | 578  | L <b>H</b> I <b>L</b> N <b>L</b> KS <b>N</b> GFDEIPVHVFKGLHQ                                                                                                                                                          |
| LRR22                                | 579   | 602  | L <b>K</b> D <b>L</b> DLGS <b>N</b> NLNPATLFDDQTS                                                                                                                                                                     |
| LRR23                                | 603   | 627  | L <b>N</b> TL <b>N</b> LQ <b>K</b> N <b>L</b> ITSVEENVFGPAFKS                                                                                                                                                         |
| LRR24                                | 628   | 651  | L <b>R</b> T <b>L</b> EM <b>D</b> FN <b>P</b> FDCTCESIAWFASW                                                                                                                                                          |
| LRR-CT                               | 652   | 696  | LN <b>D</b> TQAYIPGLQSQYICNTPPKYHGTLVLHFDT <b>S</b> ACKDSAPFKLL                                                                                                                                                       |
| Transmembrane                        | 697   | 719  | F <b>L</b> ITTT <b>V</b> VVMQFMFIVLLIHFE <b>G</b> W                                                                                                                                                                   |
| TIR                                  | 720   | 896  | RIAFYWNISINRILGFKELDRLPG <b>V</b> <b>F</b> DYDAYVIHARKDTNWWLTNFTSLENEQFQ<br>VKFCLEERDFEAGISEFEAIINCIRRSRKIIIFIVTEHLL <b>Q</b> DPWCRKFKVHHALQQAIEQ<br>SRDSIILFLHNIQDYKLNHALCLRRGMFRSCCINWPVQKERINAFHQQLMMALK<br>SNSKVR |

## Supplementary Table 7

### Domain characterization of TLR4

The conserved segment of each LRR is underlined. The conserved leucine or equivalent hydrophobic residues are in green and the conserved asparagine or equivalent hydrogen-donor residues are in red. The amino acids identified as under positive selection are in bold. In addition to that, *M8 sites under positive selection* are in italic, with *Type 2 residue* colored in light blue and *type 1 residue* in dark blue.

| TLR4 – Gallus Gallus- NP_001025864.1 |       |      |                                                                                                                                                                                             |
|--------------------------------------|-------|------|---------------------------------------------------------------------------------------------------------------------------------------------------------------------------------------------|
| Domain                               | Start | Stop | Sequence                                                                                                                                                                                    |
| Signal                               | 1     | 30   | MPSRAAPTALTGLVLLQLLLVSLLAGCIP                                                                                                                                                               |
| LRR-NT                               | 31    | 58   | SPCLEVIPSTAFRCTGQNISGVPAEIPN                                                                                                                                                                |
| LRR1                                 | 60    | 83   | <u>TLDLDSFN</u> SLKLLSSNYFSSVPE                                                                                                                                                             |
| LRR2                                 | 84    | 107  | <u>LQFLDLSRCHI</u> HTIEDNSFVDLYN                                                                                                                                                            |
| LRR3                                 | 108   | 131  | <u>LSTLILTANSL</u> QHLGLAAFHGLTS                                                                                                                                                            |
| LRR4                                 | 132   | 155  | <u>LKKLVLVET</u> SISSLDLPIGHLNT                                                                                                                                                             |
| LRR5                                 | 156   | 180  | <u>LQELNLGHN</u> NIASLKLPHYFANLTS                                                                                                                                                           |
| LRR6                                 | 181   | 208  | <u>LRHLSFSN</u> NITYISKGDLDALRETNRL                                                                                                                                                         |
| LRR7                                 | 209   | 231  | <u>NLTVLVLSL</u> NNIKYIQSGSFAKIH                                                                                                                                                            |
| LRR8                                 | 232   | 258  | <u>LGEILRSF</u> ENLAMHSSLQGLAGLQ                                                                                                                                                            |
| LRR9                                 | 259   | 288  | <u>VNRLIVGEFTN</u> LKITAFQNGLLSGLCQVQ                                                                                                                                                       |
| LRR10                                | 289   | 313  | <u>MQEFVLMCFR</u> EFENDTDTLFDCIGN                                                                                                                                                           |
| LRR11                                | 314   | 335  | <u>VTTIRLVDL</u> NLETLSEVPMFSQ                                                                                                                                                              |
| LRR12                                | 336   | 359  | <u>VKHLEWKR</u> CKEQELPAEKLSLFKE                                                                                                                                                            |
| LRR13                                | 360   | 383  | <u>LRVLRITK</u> SKDLNGFEQKF <sup>GS</sup> LT                                                                                                                                                |
| LRR14                                | 384   | 409  | <u>LEVVDLSE</u> NRLSFLTCCSPK <sup>PR</sup> SPN                                                                                                                                              |
| LRR15                                | 410   | 432  | <u>LKHLNLSFN</u> SDISLTGEFANLRN                                                                                                                                                             |
| LRR16                                | 433   | 457  | <u>LLYDLQHT</u> KLIHHGTYPVFLLLQK                                                                                                                                                            |
| LRR17                                | 458   | 481  | <u>LIYLDISY</u> TKTHVMShLIFHGLNS                                                                                                                                                            |
| LRR18                                | 482   | 506  | <u>LQVLKMAG</u> NSFENNTLTNNFENVRR                                                                                                                                                           |
| LRR19                                | 507   | 530  | <u>LRILDISS</u> CKLVWVDQSTFNALSE                                                                                                                                                            |
| LRR20                                | 531   | 554  | <u>LKELIISN</u> NKLLTFDPVYTKPLQA                                                                                                                                                            |
| LRR21                                | 555   | 579  | <u>LTALDFS</u> NNQMSFLSDSALEILPDS                                                                                                                                                           |
| LRR22                                | 580   | 603  | <u>LVLLDISH</u> NLFECSC <sup>HL</sup> NFLKW <sup>V</sup>                                                                                                                                    |
| LRR-CT                               | 604   | 639  | KEKQDLLQNKHSMICHTPAYM <sup>K</sup> N <sup>M</sup> SLSNFDMSCHP                                                                                                                               |
| Transmembrane                        | 640   | 662  | <u>N</u> PTTVACSVTVLLAAGVFLFIY                                                                                                                                                              |
| TIR                                  | 663   | 843  | KYYFQLYYSVLVLSGCKHSAERGDYDAFVIHSSKDQEWVMKELVEPLEEGKPPQLCLY<br>FRDFLPGVPIVTNIIQEGFLSSRNVIAVISADFLESKWCSFEFDIARSWQLVEGKAGIIMII<br>LGEVDKTLRLQRLGSLRYLRRNTYLEWKNKEISRHIFWRQLTSVLLEGKKWNHHEIKLM |

Supplementary Table 8

## Domain characterization of TLR5

The conserved segment of each LRR is underlined. The conserved leucine or equivalent hydrophobic residues are in green and the conserved asparagine or equivalent hydrogen-donor residues are in red. The amino acids identified as under positive selection are in bold. In addition to that, *M8 sites under positive selection* are in italic, with *Type 2 residue* colored in light blue.

| TLR5 – <i>Gallus Gallus</i> - NP_001019757.1 |       |      |                                                                                                                                                                                                                                                                    |
|----------------------------------------------|-------|------|--------------------------------------------------------------------------------------------------------------------------------------------------------------------------------------------------------------------------------------------------------------------|
| Domain                                       | Start | Stop | Sequence                                                                                                                                                                                                                                                           |
| Signal                                       | 1     | 22   | MMLHQRLIIVFGIALAGDI <b>CAS</b>                                                                                                                                                                                                                                     |
| LRR-NT                                       | 23    | 47   | R <b>SCY</b> SEDQVSMY <b>N</b> SCNLTGVPPVPK                                                                                                                                                                                                                        |
| LRR1                                         | 49    | 72   | TAK <b>LFLTY</b> <b>NY</b> IRQVTATSFILLED                                                                                                                                                                                                                          |
| LRR2                                         | 73    | 98   | <b>LFLLE</b> IG <b>TQ</b> RVFPLYIGKEAFRNLPN                                                                                                                                                                                                                        |
| LRR3                                         | 99    | 122  | <b>LRVLD</b> L <b>GF</b> <b>N</b> NILLDLDSFAGLQR                                                                                                                                                                                                                   |
| LRR4                                         | 123   | 148  | <b>LTILRL</b> <b>FQ</b> <b>NN</b> LGD <b>SILEERY</b> FQDL <b>RS</b>                                                                                                                                                                                                |
| LRR5                                         | 149   | 173  | <b>LEELD</b> L <b>SG</b> <b>NQ</b> ITKLHPHPLFYNTI                                                                                                                                                                                                                  |
| LRR6                                         | 174   | 199  | <b>LKAVNL</b> K <b>F</b> <b>N</b> KISNLCESNLT <b>SFQ</b> GKH                                                                                                                                                                                                       |
| LRR7                                         | 200   | 229  | <b>FSF</b> SL <b>STN</b> <b>T</b> LYKTDKMIWAKCPN <b>PF</b> <b>R</b> NIT                                                                                                                                                                                            |
| LRR8                                         | 230   | 256  | <b>FNS</b> L <b>DVSE</b> <b>NG</b> WSTETVQYFCTAIKGTQ                                                                                                                                                                                                               |
| LRR9                                         | 257   | 291  | <b>IN</b> <b>YLS</b> <b>FR</b> SHTMGSGFGFN <b>LN</b> KNP <b>D</b> TDTFTGLARSD                                                                                                                                                                                      |
| LRR10                                        | 292   | 315  | <b>LHLLD</b> I <b>SN</b> GFIFSLNSLIFESLRN                                                                                                                                                                                                                          |
| LRR11                                        | 316   | 339  | <b>LEFLNL</b> <b>FR</b> <b>N</b> KINQIQKQAF <b>G</b> LEN                                                                                                                                                                                                           |
| LRR12                                        | 340   | 363  | <b>LEILNL</b> <b>SS</b> <b>N</b> LLGELYDYTFEGLHS                                                                                                                                                                                                                   |
| LRR13                                        | 364   | 387  | <b>IMYID</b> L <b>QQ</b> <b>N</b> HIGMIGEK <b>S</b> FSNLVN                                                                                                                                                                                                         |
| LRR14                                        | 388   | 406  | <b>LKIIDL</b> RD <b>NA</b> IKKLPSFPH                                                                                                                                                                                                                               |
| LRR15                                        | 407   | 426  | <b>LSAFL</b> SD <b>N</b> K <b>M</b> MSVA <b>H</b> TAIV                                                                                                                                                                                                             |
| LRR16                                        | 427   | 451  | <b>ATHIEL</b> R <b>N</b> WLANLGDLVLFQVPG                                                                                                                                                                                                                           |
| LRR17                                        | 452   | 476  | <b>VQYLL</b> L <b>KQ</b> <b>N</b> RFSY <b>C</b> V <b>K</b> HVD <b>AI</b> EN <b>N</b> Q                                                                                                                                                                             |
| LRR18                                        | 477   | 505  | <b>LIYMD</b> L <b>GEN</b> <b>N</b> MLQLVWERGLCLDV <b>F</b> RTL <b>S</b> K                                                                                                                                                                                          |
| LRR19                                        | 506   | 529  | <b>LQVLHL</b> NN <b>NY</b> LSALPQE <b>I</b> F <b>N</b> GLTS                                                                                                                                                                                                        |
| LRR20                                        | 530   | 551  | <b>LKRLNL</b> AS <b>N</b> LLSHLSLRVFPQS                                                                                                                                                                                                                            |
| LRR21                                        | 552   | 572  | <b>LTN</b> LN <b>LSG</b> <b>N</b> QLFSPKPEVFMT                                                                                                                                                                                                                     |
| LRR22                                        | 573   | 596  | <b>LSILD</b> ITH <b>N</b> KYVCD <b>C</b> ALKSLLVWL                                                                                                                                                                                                                 |
| LRR-CT                                       | 597   | 645  | NETNVTLAGESED <b>RY</b> CVYPALAGVPVSFLTYDDC <b>D</b> EDELQQTLRFSVF                                                                                                                                                                                                 |
| Transmembrane                                | 646   | 668  | VFLSVTLLMF <b>LM</b> ST <b>I</b> IFTRCRGI                                                                                                                                                                                                                          |
| TIR                                          | 669   | 861  | CFVWYKTITKTLIGSHPPAADTSEYMYDAYLCYSKNDFEWVQNSLLKHLDSQYFDK<br>NRFTLCFEERDFLPGEHINNIRD <b>AI</b> WKS <b>R</b> KTICVVTRQFLKDGWCVEAF <b>N</b> FAQSR<br>YFSDLKEVLIMVVVGSLSQYQLMKHKPIRIFLQ <b>RS</b> RYLRWPEDYQDIGWFLD <b>N</b> LSS<br>QILKEKKVQR <b>N</b> VSGIELQTIATVSH |

**Supplementary Table 9 Domain characterization of TLR7**

The conserved segment of each LRR is underlined. The conserved leucine or equivalent hydrophobic residues are in green and the conserved asparagine or equivalent hydrogen-donor residues are in red. The amino acids identified as under positive selection are in bold. In addition to that, *M8 sites under positive selection* are in italic, with *Type 2 residue* colored in light blue and *type 1 residue* in dark blue.

| TLR7 – Gallus gallus - NP_001011688.1 |       |      |                                                                                                                                                                                                   |
|---------------------------------------|-------|------|---------------------------------------------------------------------------------------------------------------------------------------------------------------------------------------------------|
| Domain                                | Start | Stop | Sequence                                                                                                                                                                                          |
| Signal                                | 1     | 36   | MTNLSEVAHRKMMVHHARTSNALLFVLLFLFPMLLS                                                                                                                                                              |
| LRR-NT                                | 38    | 73   | RWFPKTLPCDVEAFESTVRVDCSDRRRLKEVPRGIPG                                                                                                                                                             |
| LRR1                                  | 75    | 98   | ATNLTLTINHIPRISPVSTQLEN                                                                                                                                                                           |
| LRR2                                  | 99    | 136  | LVEIDFRCNCVPPRLGPKDNVCITPPSIENGSAALSR                                                                                                                                                             |
| LRR3                                  | 137   | 157  | LKSLYLDANQLSKIPRGLPAT                                                                                                                                                                             |
| LRR4                                  | 158   | 181  | LRLSLEANNIFSIKKNTFSELRN                                                                                                                                                                           |
| LRR5                                  | 182   | 213  | IELLYLGQNCYRNPNCNVSFEIETAFLNLKN                                                                                                                                                                   |
| LRR6                                  | 214   | 234  | LTVLSLKSNNLTFIPPNLSST                                                                                                                                                                             |
| LRR7                                  | 235   | 258  | LKELYIYNNRIQEVQEHDSLNLN                                                                                                                                                                           |
| LRR8                                  | 259   | 298  | LEILDLSGNCPRCYNAPYCTPCPN/IKIHSKAFYSLKK                                                                                                                                                            |
| LRR9                                  | 299   | 322  | LRIRLHSNSLQSISSWFKNIKN                                                                                                                                                                            |
| LRR10                                 | 323   | 348  | LKNLDLSQNF/KEIGDAEFLKLIPS                                                                                                                                                                         |
| LRR11                                 | 349   | 378  | LVELDLSNFELQMYSPFLNLSKTFSCLSN                                                                                                                                                                     |
| LRR12                                 | 379   | 405  | LETLRIGYVEKELRENLDPLLNLRN                                                                                                                                                                         |
| LRR13                                 | 406   | 429  | LTVLDLGTNFIKIADLRVFKKFRS                                                                                                                                                                          |
| LRR14                                 | 430   | 504  | LKIIDLSMNKISPSSGESNFYGFCDHRITVEQYSRHVLQEMHYFRYDEYGRSCKSKDK<br>EADSYQPLVNGDCMSY                                                                                                                    |
| LRR15                                 | 505   | 528  | GETLDLSRNNIFFVNSIDFQDLSF                                                                                                                                                                          |
| LRR16                                 | 529   | 553  | LKCLNLSGNAISQTLNGSEFYLSG                                                                                                                                                                          |
| LRR17                                 | 554   | 577  | LKYLDFSNNRIDLLYSTAFKELKF                                                                                                                                                                          |
| LRR18                                 | 578   | 607  | LEILDLSNNKHFLAEGVSHVLSFMKNLAY                                                                                                                                                                     |
| LRR19                                 | 608   | 630  | LKKLMMNENEISTSISTGMESQS                                                                                                                                                                           |
| LRR20                                 | 631   | 661  | LQLEFRGNRLDIFWSDGKKEYLSFFKNLTN                                                                                                                                                                    |
| LRR21                                 | 662   | 686  | LEQLDISPNMLNFLPPDVFEAMPPE                                                                                                                                                                         |
| LRR22                                 | 687   | 710  | LKILNLTSNRLHTFNWGLHLLTK                                                                                                                                                                           |
| LRR23                                 | 711   | 734  | LITLDLSNLLTVP RKLSNCTST                                                                                                                                                                           |
| LRR24                                 | 735   | 758  | LQELILRNNRITRITKYFLRGAIQ                                                                                                                                                                          |
| LRR25                                 | 759   | 784  | LTYLDSLSSNKIQIKKSSFPENIINN                                                                                                                                                                        |
| LRR26                                 | 785   | 807  | LRMLLLHNNPFCNCDAVWFGW                                                                                                                                                                             |
| LRR-CT                                | 808   | 852  | INQTQVAIPLLATDVTGAGPGAHKGRSLVFLDLNTCELDTSYFIM                                                                                                                                                     |
| Transmembrane                         | 853   | 875  | YALSTSAVLCLMMFAVMShlyFW                                                                                                                                                                           |
| TIR                                   | 876   | 1059 | DMWYSYHYCTAKLKGRRIPDPACYDAFIAYDNTDLAVNEWVMTLVEKLEDQK<br>ARQFNLCLEERDWLPGQPVFDNLSQSIQLSKKTIFVLTNKKYIKSGTFKTTFYMAHQRL<br>LDEKIDVILIFLEKVLQKSRYVQLRKRLCRSSVLEWPTNPRSQPYFWQRLKNAIAMN<br>NTLSYNKLLQETV |



Supplementary Table 10

## Domain characterization of TLR15

The conserved segment of each LRR is underlined. The conserved leucine or equivalent hydrophobic residues are in green and the conserved asparagine or equivalent hydrogen-donor residues are in red. The amino acids identified as under positive selection are in bold. In addition to that, *M8 sites under positive selection* are in italic, with *Type 2 residue* colored in light blue.

| TLR15 – Gallus gallus- NP_001032924.1 |       |      |                                                                                                                                                                                                                                                 |
|---------------------------------------|-------|------|-------------------------------------------------------------------------------------------------------------------------------------------------------------------------------------------------------------------------------------------------|
| Domain                                | Start | Stop | Sequence                                                                                                                                                                                                                                        |
| Signal                                | 1     | 22   | MRILIGSLYFYFISFLFS <b>K</b> VNG                                                                                                                                                                                                                 |
| LRR-NT                                | 23    | 55   | FLT <b>Q</b> RTSPV <b>S</b> FPFY <b>N</b> YSYLNLSVSQAQAPKT                                                                                                                                                                                      |
| LRR1                                  | 56    | 79   | <u>ARALNFSYNAIEKITKRDFEGFHV</u>                                                                                                                                                                                                                 |
| LRR2                                  | 80    | 103  | <u>LEVLDLSHNHIKDIEPGAFENLLS</u>                                                                                                                                                                                                                 |
| LRR3                                  | 104   | 202  | <u>LVSVDLSFNDK</u> NLLVSGLAPHKLIPITSGASG <b>P</b> SQIYMYFQ <b>K</b> SAEAA <b>L</b> EPSAPAE <b>L</b><br>PHLEDPPN <b>P</b> GNVNPRFRQRRTEEN <b>K</b> TSPPA <b>A</b> TLRPDL <b>C</b> GAPI                                                           |
| LRR4                                  | 203   | 233  | <u>NGLLDLSRTKLSNEELTAKLDADLCQAQLGT</u>                                                                                                                                                                                                          |
| LRR5                                  | 234   | 260  | <u>VLEFNISHSDLEMDLLSLFILFLPMKD</u>                                                                                                                                                                                                              |
| LRR6                                  | 261   | 288  | <u>IQSVDA<b>S</b>YNRITINNIDVEAICHFPFSN</u>                                                                                                                                                                                                      |
| LRR7                                  | 289   | 310  | <u>FSFLNISNNPINSLETVCPLAS</u>                                                                                                                                                                                                                   |
| LRR8                                  | 311   | 334  | <u>ITVIDLSFTNISTIPANFAKKLSK</u>                                                                                                                                                                                                                 |
| LRR9                                  | 335   | 365  | <u>LERMYVQGNQLIYTVRPENPSATPR<b>P</b>PGTVQ</u>                                                                                                                                                                                                   |
| LRR10                                 | 366   | 387  | <u>ISAISLVRNQAGTPIESLPES</u>                                                                                                                                                                                                                    |
| LRR11                                 | 388   | 411  | <u>VKHLKVSNC<b>S</b>IVELPEWFANRMQE</u>                                                                                                                                                                                                          |
| LRR12                                 | 412   | 431  | <u>LLFLDLSSNRISMLPDLPI<b>S</b></u>                                                                                                                                                                                                              |
| LRR13                                 | 432   | 454  | <u>LQQLDISNSDIKIIPPRFKLSLN</u>                                                                                                                                                                                                                  |
| LRR14                                 | 455   | 476  | <u>VTVFNIQNNKLTEMHPEYFPST</u>                                                                                                                                                                                                                   |
| LRR15                                 | 477   | 498  | <u>LTTCDISK<b>N</b>KLKVLSTKALEN</u>                                                                                                                                                                                                             |
| LRR16                                 | 499   | 520  | <u>LESINVSGNLITRLEPACQLPS</u>                                                                                                                                                                                                                   |
| LRR17                                 | 521   | 544  | <u>LTNLDSSHNLISELPDHLGQSLLM</u>                                                                                                                                                                                                                 |
| LRR18                                 | 545   | 566  | <u>LKHFNLSGNKISFLQRGSLPAS</u>                                                                                                                                                                                                                   |
| LRR19                                 | 567   | 590  | <u>LEELDISDN<b>A</b>ITTIVQDTFGQLTS</u>                                                                                                                                                                                                          |
| LRR20                                 | 591   | 615  | <u>LSVLT<b>V</b>QGHFFCNCPLYWVFN<b>I</b></u>                                                                                                                                                                                                     |
| LRR-CT                                | 616   | 653  | RNPHL <b>Q</b> INGK <b>D</b> LRC <b>S</b> FPDRRGSLVKSSNLT <b>L</b> LHCSL                                                                                                                                                                        |
| Transmembrane                         | 654   | 676  | GI <b>Q</b> MAIT <b>A</b> CMAILVVVLTLGLCW                                                                                                                                                                                                       |
| TIR                                   | 677   | 868  | RFDGLWYVRMGWYWCMARRQYKKRPENKPFDAFISYSEHDADWTKEH <b>L</b> LKKL<br>ETDGFKICYHERDFKPGHPVLGNIFYCIENSHKVLFLVSPSFVNSWCWCQYELYFAEH<br>RVLDENQDSLIMVVLEDLPD <b>S</b> VPQKFSKLRKLLKRKTYLKWSPEEHKQKIFWHQL<br>AAVLKTTNEPLVRAENGP <b>N</b> EDV <b>I</b> EME |
